# Supplementary material
Source: MDPI journal article supplement (https://www.mdpi.com/2073-4441/13/15/2004)
Supplement: s1 [file s1]

**Table S1.** Network details for the network in Figure-1.

| Link | From Node | To Node | Length(m) | Population | Diameter(m) | Slope  | Velocity(m/s) |
|------|-----------|---------|-----------|------------|-------------|--------|---------------|
| 1    | 56        | 59      | 343       | 500        | 0.4         | 0.0058 | 0.973         |
| 2    | 58        | 59      | 217       | 500        | 0.4         | 0.0092 | 1.076         |
| 3    | 57        | 59      | 318       | 500        | 0.4         | 0.0063 | 0.845         |
| 4    | 60        | 56      | 486       | 200        | 0.4         | 0.0041 | 0.844         |
| 5    | 47        | 50      | 241       | 500        | 0.2         | 0.0083 | 0.670         |
| 6    | 50        | 55      | 591       | 100        | 0.2         | 0.0051 | 0.573         |
| 7    | 55        | 60      | 544       | 100        | 0.4         | 0.0037 | 0.806         |
| 8    | 63        | 62      | 752       | 200        | 0.4         | 0.0027 | 0.657         |
| 9    | 62        | 61      | 488       | 200        | 0.4         | 0.0041 | 0.775         |
| 10   | 61        | 48      | 340       | 300        | 0.4         | 0.0059 | 0.894         |
| 11   | 48        | 49      | 227       | 200        | 0.4         | 0.0088 | 1.043         |
| 12   | 49        | 55      | 559       | 200        | 0.4         | 0.0036 | 0.759         |
| 13   | 86        | 87      | 414       | 500        | 0.4         | 0.0048 | 0.650         |
| 14   | 87        | 88      | 413       | 200        | 0.4         | 0.0048 | 0.663         |
| 15   | 88        | 51      | 382       | 500        | 0.4         | 0.0052 | 0.712         |
| 16   | 51        | 53      | 1010      | 500        | 0.4         | 0.0020 | 0.522         |
| 17   | 53        | 57      | 236       | 600        | 0.4         | 0.0085 | 0.912         |
| 18   | 44        | 45      | 485       | 500        | 0.4         | 0.0041 | 0.764         |
| 19   | 45        | 46      | 555       | 500        | 0.4         | 0.0036 | 0.743         |
| 20   | 46        | 52      | 730       | 50         | 0.4         | 0.0027 | 0.674         |
| 21   | 52        | 54      | 417       | 50         | 0.4         | 0.0048 | 0.827         |
| 22   | 54        | 58      | 322       | 200        | 0.4         | 0.0062 | 0.915         |
| 23   | 65        | 97      | 568       | 200        | 0.4         | 0.0035 | 0.690         |
| 24   | 97        | 98      | 479       | 600        | 0.4         | 0.0042 | 0.756         |
| 25   | 98        | 63      | 356       | 300        | 0.4         | 0.0056 | 0.854         |
| 26   | 24        | 13      | 300       | 300        | 0.05        | 0.0100 | 0.380         |
| 27   | 13        | 14      | 583       | 300        | 0.1         | 0.0069 | 0.451         |
| 28   | 19        | 17      | 649       | 200        | 0.3         | 0.0031 | 0.576         |
| 29   | 14        | 19      | 455       | 200        | 0.3         | 0.0044 | 0.616         |
| 30   | 17        | 64      | 374       | 200        | 0.3         | 0.0054 | 0.751         |
| 31   | 64        | 65      | 922       | 50         | 0.4         | 0.0022 | 0.532         |
| 32   | 10        | 13      | 459       | 350        | 0.05        | 0.0109 | 0.363         |
| 33   | 25        | 13      | 462       | 350        | 0.05        | 0.0087 | 0.333         |
| 34   | 26        | 13      | 523       | 350        | 0.05        | 0.0096 | 0.345         |
| 35   | 11        | 12      | 300       | 200        | 0.05        | 0.0100 | 0.347         |
| 36   | 12        | 14      | 407       | 100        | 0.1         | 0.0074 | 0.449         |
| 37   | 96        | 14      | 568       | 300        | 0.05        | 0.0106 | 0.389         |
| 38   | 15        | 19      | 397       | 100        | 0.1         | 0.0076 | 0.333         |
| 39   | 23        | 19      | 464       | 300        | 0.05        | 0.0108 | 0.393         |
| 40   | 16        | 17      | 333       | 100        | 0.1         | 0.0090 | 0.354         |
| 41   | 22        | 21      | 381       | 150        | 0.05        | 0.0105 | 0.419         |
| 42   | 20        | 18      | 235       | 200        | 0.1         | 0.0085 | 0.511         |
| 43   | 18        | 17      | 326       | 100        | 0.2         | 0.0061 | 0.457         |
| 44   | 21        | 20      | 297       | 50         | 0.05        | 0.0101 | 0.348         |
| 46   | 66        | 65      | 200       | 1000       | 0.05        | 0.0150 | 0.438         |
| 47   | 67        | 66      | 300       | 200        | 0.05        | 0.0100 | 0.347         |
| 48   | 43        | 44      | 416       | 200        | 0.4         | 0.0048 | 0.788         |
| 49   | 89        | 43      | 296       | 200        | 0.4         | 0.0068 | 0.795         |
| 50   | 90        | 89      | 420       | 200        | 0.4         | 0.0048 | 0.692         |
| 51   | 91        | 90      | 503       | 200        | 0.4         | 0.0040 | 0.638         |
| 52   | 40        | 91      | 393       | 50         | 0.4         | 0.0051 | 0.684         |
| 53   | 36        | 37      | 184       | 50         | 0.05        | 0.0163 | 0.383         |

|     |     |     |     |     |      |        |       |
|-----|-----|-----|-----|-----|------|--------|-------|
| 54  | 37  | 39  | 289 | 50  | 0.05 | 0.0104 | 0.388 |
| 55  | 39  | 40  | 234 | 50  | 0.1  | 0.0085 | 0.391 |
| 56  | 35  | 38  | 373 | 50  | 0.3  | 0.0054 | 0.700 |
| 57  | 38  | 40  | 301 | 50  | 0.3  | 0.0066 | 0.760 |
| 58  | 32  | 33  | 238 | 50  | 0.1  | 0.0084 | 0.449 |
| 59  | 33  | 34  | 225 | 50  | 0.3  | 0.0089 | 0.651 |
| 60  | 34  | 35  | 305 | 50  | 0.3  | 0.0065 | 0.749 |
| 61  | 29  | 33  | 488 | 50  | 0.3  | 0.0041 | 0.457 |
| 62  | 27  | 32  | 300 | 200 | 0.05 | 0.0100 | 0.347 |
| 63  | 68  | 69  | 320 | 50  | 0.1  | 0.0063 | 0.254 |
| 64  | 69  | 70  | 246 | 200 | 0.2  | 0.0081 | 0.412 |
| 65  | 70  | 71  | 263 | 100 | 0.2  | 0.0076 | 0.445 |
| 66  | 71  | 29  | 660 | 250 | 0.2  | 0.0030 | 0.375 |
| 67  | 3   | 6   | 403 | 250 | 0.1  | 0.0075 | 0.429 |
| 68  | 6   | 72  | 508 | 500 | 0.1  | 0.0059 | 0.499 |
| 69  | 72  | 73  | 303 | 500 | 0.2  | 0.0066 | 0.610 |
| 70  | 73  | 30  | 340 | 200 | 0.2  | 0.0059 | 0.610 |
| 71  | 30  | 34  | 468 | 200 | 0.2  | 0.0043 | 0.562 |
| 72  | 28  | 29  | 300 | 300 | 0.05 | 0.0100 | 0.380 |
| 73  | 94  | 93  | 300 | 400 | 0.05 | 0.0100 | 0.363 |
| 74  | 95  | 93  | 392 | 300 | 0.05 | 0.0102 | 0.384 |
| 75  | 92  | 41  | 298 | 200 | 0.05 | 0.0101 | 0.348 |
| 76  | 41  | 93  | 300 | 300 | 0.05 | 0.0100 | 0.353 |
| 77  | 93  | 42  | 231 | 50  | 0.08 | 0.0130 | 0.593 |
| 78  | 42  | 43  | 300 | 400 | 0.05 | 0.0100 | 0.361 |
| 79  | 2   | 5   | 430 | 200 | 0.1  | 0.0070 | 0.394 |
| 80  | 5   | 7   | 215 | 50  | 0.2  | 0.0093 | 0.431 |
| 81  | 7   | 8   | 280 | 50  | 0.2  | 0.0071 | 0.415 |
| 82  | 8   | 78  | 330 | 50  | 0.2  | 0.0061 | 0.410 |
| 83  | 78  | 79  | 213 | 50  | 0.2  | 0.0094 | 0.498 |
| 84  | 79  | 80  | 522 | 50  | 0.3  | 0.0038 | 0.358 |
| 85  | 9   | 76  | 412 | 200 | 0.05 | 0.0121 | 0.373 |
| 86  | 76  | 80  | 463 | 50  | 0.1  | 0.0065 | 0.408 |
| 87  | 1   | 4   | 347 | 50  | 0.1  | 0.0086 | 0.284 |
| 88  | 4   | 75  | 464 | 50  | 0.1  | 0.0065 | 0.315 |
| 89  | 74  | 75  | 371 | 200 | 0.05 | 0.0081 | 0.320 |
| 90  | 75  | 77  | 282 | 50  | 0.2  | 0.0071 | 0.433 |
| 91  | 77  | 31  | 253 | 50  | 0.2  | 0.0079 | 0.469 |
| 92  | 31  | 80  | 504 | 200 | 0.1  | 0.0040 | 0.328 |
| 93  | 80  | 81  | 251 | 50  | 0.3  | 0.0080 | 0.641 |
| 94  | 81  | 82  | 331 | 200 | 0.3  | 0.0060 | 0.605 |
| 95  | 82  | 83  | 297 | 200 | 0.3  | 0.0067 | 0.652 |
| 96  | 83  | 84  | 316 | 400 | 0.3  | 0.0063 | 0.676 |
| 97  | 84  | 85  | 314 | 200 | 0.3  | 0.0064 | 0.696 |
| 98  | 85  | 86  | 452 | 50  | 0.3  | 0.0044 | 0.614 |
| 99  | 99  | 100 | 332 | 200 | 0.05 | 0.0121 | 0.372 |
| 100 | 100 | 101 | 246 | 200 | 0.05 | 0.0122 | 0.391 |
| 101 | 101 | 102 | 385 | 200 | 0.05 | 0.0104 | 0.374 |
| 102 | 102 | 47  | 300 | 200 | 0.05 | 0.0117 | 0.394 |
| 103 | 59  | STP | 343 | 0   | 0.4  | 0.0058 | 1.201 |

Table S2. Network Details for IIT Madras Network.

1

| Link | From Node | To Node | Length (m) | Chamber Location | Population | Diameter (m) | Slope (1 in) | Water Demand (lpcd) | Manning's $n$ | Design Velocity (m/s) |
|------|-----------|---------|------------|------------------|------------|--------------|--------------|---------------------|---------------|-----------------------|
| 1    | 1         | 2       | 30         | 1                | 10         | 0.15         | 200          | 135                 | 0.015         | 0.14                  |
| 2    | 2         | 3       | 30         | -                | 0          | 0.15         | 200          | 0                   | 0.015         | 0.14                  |
| 3    | 3         | 4       | 30         | -                | 0          | 0.15         | 200          | 0                   | 0.015         | 0.14                  |
| 4    | 4         | 5       | 30         | -                | 0          | 0.15         | 200          | 0                   | 0.015         | 0.14                  |
| 5    | 5         | 6       | 30         | -                | 0          | 0.15         | 200          | 0                   | 0.015         | 0.14                  |
| 6    | 6         | 7       | 20         | -                | 0          | 0.15         | 200          | 0                   | 0.015         | 0.14                  |
| 7    | 7         | 8       | 10         | -                | 0          | 0.15         | 200          | 0                   | 0.015         | 0.14                  |
| 8    | 8R14      | 8R13    | 30         | 8R14             | 10         | 0.15         | 200          | 135                 | 0.015         | 0.14                  |
| 9    | 8R13R1    | 8R13    | 30         | 8R13R1           | 10         | 0.15         | 200          | 135                 | 0.015         | 0.14                  |
| 10   | 8R13      | 8R12    | 10         | -                | 0          | 0.15         | 290          | 0                   | 0.015         | 0.15                  |
| 11   | 8R12      | 8R11    | 30         | -                | 0          | 0.15         | 290          | 0                   | 0.015         | 0.15                  |
| 12   | 8R11      | 8R10    | 30         | -                | 0          | 0.15         | 290          | 0                   | 0.015         | 0.15                  |
| 13   | 8R10      | 8R9     | 30         | -                | 0          | 0.15         | 290          | 0                   | 0.015         | 0.15                  |
| 14   | 8R9       | 8R8     | 17         | -                | 0          | 0.15         | 290          | 0                   | 0.015         | 0.15                  |
| 15   | 8R8       | 8R7     | 30         | -                | 0          | 0.15         | 290          | 0                   | 0.015         | 0.15                  |
| 16   | 8R7       | 8R6     | 20         | 8R7              | 8          | 0.15         | 290          | 135                 | 0.015         | 0.16                  |
| 17   | 8R6       | 8R5     | 20         | 8R6              | 15         | 0.15         | 290          | 135                 | 0.015         | 0.19                  |
| 18   | 8R5       | 8R4     | 30         | -                | 0          | 0.15         | 290          | 0                   | 0.015         | 0.19                  |
| 19   | 8R4       | 8R3     | 30         | -                | 0          | 0.15         | 290          | 0                   | 0.015         | 0.19                  |
| 20   | 8R3       | 8R2     | 30         | -                | 0          | 0.15         | 290          | 0                   | 0.015         | 0.19                  |
| 21   | 8R2       | 8R1     | 30         | -                | 0          | 0.15         | 290          | 0                   | 0.015         | 0.19                  |
| 22   | 8R1       | 8       | 15         | -                | 0          | 0.15         | 290          | 0                   | 0.015         | 0.19                  |
| 23   | 8         | 9       | 30         | -                | 0          | 0.15         | 290          | 0                   | 0.015         | 0.20                  |
| 24   | 9         | 10      | 30         | -                | 0          | 0.15         | 290          | 0                   | 0.015         | 0.20                  |
| 25   | 10        | 11      | 30         | -                | 0          | 0.15         | 290          | 0                   | 0.015         | 0.20                  |
| 26   | 11        | 12      | 30         | -                | 0          | 0.15         | 290          | 0                   | 0.015         | 0.20                  |
| 27   | 12        | 13      | 30         | -                | 0          | 0.15         | 290          | 0                   | 0.015         | 0.20                  |
| 28   | 13        | 14      | 30         | -                | 0          | 0.15         | 290          | 0                   | 0.015         | 0.20                  |
| 29   | 14        | 15      | 30         | -                | 0          | 0.15         | 290          | 0                   | 0.015         | 0.20                  |
| 30   | 15        | 16      | 14.5       | 15               | 60         | 0.15         | 290          | 135                 | 0.015         | 0.25                  |
| 31   | 16        | 17      | 30         | -                | 0          | 0.15         | 290          | 0                   | 0.015         | 0.25                  |
| 32   | 17        | 18      | 15         | -                | 0          | 0.15         | 290          | 0                   | 0.015         | 0.25                  |
| 33   | 18        | 19      | 30         | 18               | 60         | 0.15         | 290          | 135                 | 0.015         | 0.28                  |
| 34   | 19R1      | 19      | 28         | 19R1             | 60         | 0.15         | 290          | 135                 | 0.015         | 0.21                  |
| 35   | 19        | 20      | 20         | -                | 0          | 0.15         | 290          | 0                   | 0.015         | 0.31                  |
| 36   | 20L6      | 20L5    | 30         | 20L6             | 5          | 0.15         | 200          | 135                 | 0.015         | 0.11                  |
| 37   | 20L5      | 20L4    | 30         | -                | 0          | 0.15         | 200          | 0                   | 0.015         | 0.11                  |
| 38   | 20L4      | 20L3    | 30         | -                | 0          | 0.15         | 200          | 0                   | 0.015         | 0.11                  |
| 39   | 20L3      | 20L2    | 20         | 20L3             | 10         | 0.15         | 200          | 135                 | 0.015         | 0.15                  |
| 40   | 20L2      | 20L1    | 25         | -                | 0          | 0.15         | 200          | 0                   | 0.015         | 0.15                  |
| 41   | 20L1      | 20      | 14         | -                | 0          | 0.15         | 200          | 0                   | 0.015         | 0.15                  |
| 42   | 20        | 21      | 25         | 20               | 90         | 0.15         | 290          | 135                 | 0.015         | 0.34                  |
| 43   | 21        | 22      | 12         | -                | 0          | 0.15         | 290          | 0                   | 0.015         | 0.34                  |
| 44   | 22R1      | 22      | 28         | 22R1             | 60         | 0.15         | 200          | 135                 | 0.015         | 0.24                  |
| 45   | 22        | 23      | 29         | -                | 0          | 0.15         | 290          | 0                   | 0.015         | 0.36                  |
| 46   | 23        | 24      | 20         | -                | 0          | 0.15         | 290          | 0                   | 0.015         | 0.36                  |
| 47   | 24        | 25      | 10         | 24               | 60         | 0.15         | 290          | 135                 | 0.015         | 0.37                  |
| 48   | 25L3      | 25L2    | 30         | 25L3             | 10         | 0.15         | 200          | 135                 | 0.015         | 0.14                  |
| 49   | 25L2      | 25L1    | 30         | 25L2             | 10         | 0.15         | 200          | 135                 | 0.015         | 0.17                  |
| 50   | 25L1      | 25      | 16.6       | -                | 0          | 0.15         | 200          | 0                   | 0.015         | 0.17                  |
| 51   | 25        | 26      | 12         | -                | 0          | 0.15         | 290          | 0                   | 0.015         | 0.38                  |
| 52   | 26        | 27      | 13         | -                | 0          | 0.15         | 300          | 0                   | 0.015         | 0.37                  |
| 53   | 27R2      | 27R1    | 8.32       | 27R2             | 20         | 0.15         | 200          | 135                 | 0.015         | 0.17                  |

|     |        |        |       |        |     |      |     |     |       |      |
|-----|--------|--------|-------|--------|-----|------|-----|-----|-------|------|
| 54  | 27R1   | 27     | 23    | -      | 0   | 0.15 | 200 | 0   | 0.015 | 0.17 |
| 55  | 27     | 28     | 30    | -      | 0   | 0.15 | 290 | 0   | 0.015 | 0.38 |
| 56  | 28     | 29     | 12    | -      | 0   | 0.15 | 290 | 0   | 0.015 | 0.38 |
| 57  | 29R5   | 29R4   | 20    | 29R5   | 30  | 0.15 | 200 | 135 | 0.015 | 0.19 |
| 58  | 29R4   | 29R3   | 19    | -      | 0   | 0.15 | 200 | 0   | 0.015 | 0.19 |
| 59  | 29R3   | 29R2   | 30    | -      | 0   | 0.15 | 200 | 0   | 0.015 | 0.19 |
| 60  | 29R2   | 29R1   | 16    | 29R2   | 30  | 0.15 | 200 | 135 | 0.015 | 0.24 |
| 61  | 29R1   | 29     | 13    | -      | 0   | 0.15 | 200 | 0   | 0.015 | 0.24 |
| 62  | 29     | 30     | 15.44 | -      | 0   | 0.15 | 290 | 0   | 0.015 | 0.39 |
| 63  | 30L7   | 30L6   | 27    | 30L7   | 20  | 0.15 | 200 | 135 | 0.015 | 0.17 |
| 64  | 30L6   | 30L5   | 12    | 30L6   | 20  | 0.15 | 200 | 135 | 0.015 | 0.21 |
| 65  | 30L5L1 | 30L5   | 15    | 30L5L1 | 40  | 0.15 | 250 | 135 | 0.015 | 0.19 |
| 66  | 30L5   | 30L4   | 18    | -      | 0   | 0.15 | 250 | 0   | 0.015 | 0.24 |
| 67  | 30L4   | 30L3   | 30    | -      | 0   | 0.15 | 250 | 0   | 0.015 | 0.24 |
| 68  | 30L3   | 30L2   | 20    | 30L3   | 40  | 0.15 | 250 | 135 | 0.015 | 0.27 |
| 69  | 30L2   | 30L1   | 30    | 30L2   | 80  | 0.15 | 250 | 135 | 0.015 | 0.31 |
| 70  | 30L1   | 30     | 15    | -      | 0   | 0.15 | 250 | 0   | 0.015 | 0.31 |
| 71  | 30     | 31     | 30    | -      | 0   | 0.15 | 290 | 0   | 0.015 | 0.43 |
| 72  | 31R1   | 31     | 12    | 31R1   | 30  | 0.15 | 200 | 135 | 0.015 | 0.19 |
| 73  | 31     | 32     | 20    | -      | 0   | 0.15 | 290 | 0   | 0.015 | 0.43 |
| 74  | 32R3   | 32R2   | 30    | 32R3   | 90  | 0.15 | 200 | 135 | 0.015 | 0.27 |
| 75  | 32R2   | 32R1   | 20    | -      | 0   | 0.15 | 200 | 0   | 0.015 | 0.27 |
| 76  | 32R1   | 32     | 15.9  | -      | 0   | 0.15 | 200 | 0   | 0.015 | 0.27 |
| 77  | 32     | 33     | 30    | -      | 0   | 0.15 | 290 | 0   | 0.015 | 0.44 |
| 78  | 33L6   | 33L5   | 20.98 | 33L6   | 20  | 0.15 | 200 | 135 | 0.015 | 0.17 |
| 79  | 33L5   | 33L4   | 10    | 33L5   | 10  | 0.15 | 200 | 135 | 0.015 | 0.19 |
| 80  | 33L4   | 33L3   | 28    | -      | 0   | 0.15 | 200 | 0   | 0.015 | 0.19 |
| 81  | 33L3   | 33L2   | 30    | 33L3   | 20  | 0.15 | 200 | 135 | 0.015 | 0.22 |
| 82  | 33L2   | 33L1   | 25    | 33L2   | 10  | 0.15 | 200 | 135 | 0.015 | 0.24 |
| 83  | 33L1   | 33     | 15    | 33L1   | 10  | 0.15 | 200 | 135 | 0.015 | 0.25 |
| 84  | 33     | 34A    | 22    | -      | 0   | 0.15 | 290 | 0   | 0.015 | 0.45 |
| 85  | 34L2   | 34L1   | 24    | 34L2   | 20  | 0.15 | 200 | 135 | 0.015 | 0.17 |
| 86  | 34L1   | 34     | 20    | -      | 0   | 0.15 | 200 | 0   | 0.015 | 0.17 |
| 87  | 34A    | 34     | 11.5  | -      | 0   | 0.15 | 290 | 0   | 0.015 | 0.45 |
| 88  | 34     | 35     | 15.5  | -      | 0   | 0.15 | 290 | 0   | 0.015 | 0.45 |
| 89  | 35R1   | 35     | 22    | 35R1   | 100 | 0.15 | 200 | 135 | 0.015 | 0.27 |
| 90  | 35     | 36     | 25    | -      | 0   | 0.15 | 290 | 0   | 0.015 | 0.46 |
| 91  | 36R1   | 36     | 30    | 36R1   | 100 | 0.15 | 200 | 135 | 0.015 | 0.27 |
| 92  | 36L4   | 36L3   | 27.9  | 36L4   | 30  | 0.15 | 200 | 135 | 0.015 | 0.19 |
| 93  | 36L3   | 36L2   | 26.29 | 36L3   | 30  | 0.15 | 200 | 135 | 0.015 | 0.24 |
| 94  | 36L2   | 36L1   | 28.28 | 36L2   | 30  | 0.15 | 200 | 135 | 0.015 | 0.27 |
| 95  | 36L1   | 36     | 19.58 | 36L1   | 30  | 0.15 | 200 | 135 | 0.015 | 0.29 |
| 96  | 36     | 37     | 15    | -      | 0   | 0.15 | 290 | 0   | 0.015 | 0.48 |
| 97  | 37     | 38     | 20    | -      | 0   | 0.15 | 290 | 0   | 0.015 | 0.48 |
| 98  | 38     | 39     | 21    | -      | 0   | 0.15 | 290 | 0   | 0.015 | 0.48 |
| 99  | 39     | 40     | 23    | 39     | 15  | 0.15 | 290 | 135 | 0.015 | 0.48 |
| 100 | 40L6L2 | 40L6L1 | 20    | 40L6L2 | 60  | 0.15 | 200 | 135 | 0.015 | 0.24 |
| 101 | 40L6L1 | 40L6   | 30    | -      | 0   | 0.15 | 200 | 0   | 0.015 | 0.24 |
| 102 | 40L6   | 40L5   | 20    | 40L6   | 60  | 0.15 | 200 | 135 | 0.015 | 0.29 |
| 103 | 40L5   | 40L4   | 20    | -      | 0   | 0.15 | 200 | 0   | 0.015 | 0.29 |
| 104 | 40L4L2 | 40L4L1 | 13    | 40L4L2 | 60  | 0.15 | 200 | 135 | 0.015 | 0.24 |
| 105 | 40L4L1 | 40L4   | 21    | -      | 0   | 0.15 | 200 | 0   | 0.015 | 0.24 |
| 106 | 40L4   | 40L3   | 22    | 40L4   | 60  | 0.15 | 200 | 135 | 0.015 | 0.35 |
| 107 | 40L3L1 | 40L3   | 30    | 40L3L1 | 60  | 0.15 | 200 | 135 | 0.015 | 0.24 |
| 108 | 40L3   | 40L2   | 22    | 40L3   | 60  | 0.15 | 200 | 135 | 0.015 | 0.40 |
| 109 | 40L2   | 40L1   | 22    | -      | 0   | 0.15 | 200 | 0   | 0.015 | 0.40 |
| 110 | 40L1   | 40     | 22    | 40L1   | 60  | 0.15 | 200 | 135 | 0.015 | 0.42 |
| 111 | 40     | 41     | 20    | -      | 0   | 0.2  | 400 | 0   | 0.013 | 0.52 |

|     |        |        |       |        |     |      |     |     |       |      |
|-----|--------|--------|-------|--------|-----|------|-----|-----|-------|------|
| 112 | 41     | 42     | 30    | -      | 0   | 0.2  | 400 | 0   | 0.013 | 0.52 |
| 113 | 42     | 43     | 20    | 42     | 60  | 0.2  | 400 | 135 | 0.013 | 0.52 |
| 114 | 43     | 44     | 15    | -      | 0   | 0.2  | 400 | 0   | 0.013 | 0.52 |
| 115 | 44L7   | 44L6   | 22    | 44L7   | 57  | 0.15 | 200 | 135 | 0.015 | 0.23 |
| 116 | 44L6   | 44L5   | 15    | 44L6   | 13  | 0.15 | 200 | 135 | 0.015 | 0.25 |
| 117 | 44L5   | 44L4   | 20    | -      | 0   | 0.15 | 200 | 0   | 0.015 | 0.25 |
| 118 | 44L4   | 44L3   | 20    | -      | 0   | 0.15 | 200 | 0   | 0.015 | 0.25 |
| 119 | 44L3   | 44L2   | 15    | 44L3   | 14  | 0.15 | 200 | 135 | 0.015 | 0.26 |
| 120 | 44L2   | 44L1   | 30    | -      | 0   | 0.15 | 200 | 0   | 0.015 | 0.26 |
| 121 | 44L1   | 44     | 17    | -      | 0   | 0.15 | 200 | 0   | 0.015 | 0.26 |
| 122 | 44     | 45     | 20    | -      | 0   | 0.2  | 400 | 0   | 0.013 | 0.53 |
| 123 | 45R5   | 45R4   | 25    | 45R5   | 30  | 0.15 | 200 | 135 | 0.015 | 0.19 |
| 124 | 45R4   | 45R3   | 30    | -      | 0   | 0.15 | 200 | 0   | 0.015 | 0.19 |
| 125 | 45R3   | 45R2   | 30    | -      | 0   | 0.15 | 200 | 0   | 0.015 | 0.19 |
| 126 | 45R2   | 45R1   | 26    | 45R2   | 30  | 0.15 | 200 | 135 | 0.015 | 0.24 |
| 127 | 45R1   | 45     | 30    | -      | 0   | 0.15 | 200 | 0   | 0.015 | 0.24 |
| 128 | 45     | 46     | 30    | -      | 0   | 0.2  | 400 | 0   | 0.013 | 0.53 |
| 129 | 46     | 47     | 30    | -      | 0   | 0.2  | 400 | 0   | 0.013 | 0.53 |
| 130 | 47     | 48     | 30    | -      | 0   | 0.2  | 400 | 0   | 0.013 | 0.53 |
| 131 | 48     | 49     | 22    | -      | 0   | 0.2  | 400 | 0   | 0.013 | 0.53 |
| 132 | 49R4   | 49R3   | 30    | 49R4   | 20  | 0.15 | 200 | 135 | 0.015 | 0.17 |
| 133 | 49R3L1 | 49R3   | 30    | 49R3L1 | 20  | 0.15 | 200 | 135 | 0.015 | 0.17 |
| 134 | 49R3   | 49R2   | 25    | 49R3   | 40  | 0.15 | 200 | 135 | 0.015 | 0.26 |
| 135 | 49R2R1 | 49R2   | 26    | 49R2R1 | 110 | 0.15 | 200 | 135 | 0.015 | 0.28 |
| 136 | 49R2   | 49R1   | 29    | -      | 0   | 0.15 | 200 | 0   | 0.015 | 0.33 |
| 137 | 49R1   | 49     | 16    | -      | 0   | 0.15 | 200 | 0   | 0.015 | 0.33 |
| 138 | 49     | 50     | 30    | -      | 0   | 0.2  | 400 | 0   | 0.013 | 0.54 |
| 139 | 50     | 51     | 30    | -      | 0   | 0.2  | 400 | 0   | 0.013 | 0.54 |
| 140 | 51     | 52     | 30    | -      | 0   | 0.2  | 400 | 0   | 0.013 | 0.54 |
| 141 | 52     | 53     | 30    | -      | 0   | 0.2  | 400 | 0   | 0.013 | 0.54 |
| 142 | 53R6   | 53R5   | 23    | 53R6   | 60  | 0.15 | 200 | 135 | 0.015 | 0.24 |
| 143 | 53R5   | 53R4   | 20    | -      | 0   | 0.15 | 200 | 0   | 0.015 | 0.24 |
| 144 | 53R4   | 53R3   | 23    | -      | 0   | 0.15 | 200 | 0   | 0.015 | 0.24 |
| 145 | 53R3   | 53R2   | 20    | -      | 0   | 0.15 | 200 | 0   | 0.015 | 0.24 |
| 146 | 53R2R1 | 53R2   | 24    | 53R2R1 | 120 | 0.15 | 200 | 135 | 0.015 | 0.29 |
| 147 | 53R2   | 53R1   | 30    | -      | 0   | 0.15 | 200 | 0   | 0.015 | 0.33 |
| 148 | 53R1R1 | 53R1   | 15.5  | 53R1R1 | 10  | 0.15 | 200 | 135 | 0.015 | 0.14 |
| 149 | 53R1   | 53     | 25    | -      | 0   | 0.15 | 200 | 0   | 0.015 | 0.33 |
| 150 | 53     | 54     | 11    | -      | 0   | 0.2  | 400 | 0   | 0.013 | 0.56 |
| 151 | 54L4   | 54L3   | 30    | 54L4   | 290 | 0.15 | 200 | 135 | 0.015 | 0.37 |
| 152 | 54L3   | 54L2   | 30    | -      | 0   | 0.15 | 200 | 0   | 0.015 | 0.37 |
| 153 | 54L2   | 54L1   | 30    | -      | 0   | 0.15 | 200 | 0   | 0.015 | 0.37 |
| 154 | 54L1   | 54     | 30    | -      | 0   | 0.15 | 200 | 0   | 0.015 | 0.37 |
| 155 | 54     | 55     | 19    | -      | 0   | 0.2  | 400 | 0   | 0.013 | 0.57 |
| 156 | 55     | 56     | 30    | -      | 0   | 0.2  | 400 | 0   | 0.013 | 0.57 |
| 157 | 56     | 57     | 30    | -      | 0   | 0.2  | 400 | 0   | 0.013 | 0.57 |
| 158 | 57     | 58     | 30    | -      | 0   | 0.2  | 400 | 0   | 0.013 | 0.57 |
| 159 | 58     | 59     | 30    | -      | 0   | 0.2  | 400 | 0   | 0.013 | 0.57 |
| 160 | 59     | 60     | 30    | -      | 0   | 0.2  | 400 | 0   | 0.013 | 0.57 |
| 161 | 60     | 61     | 30    | -      | 0   | 0.2  | 400 | 0   | 0.013 | 0.57 |
| 162 | 61     | 62     | 30    | -      | 0   | 0.2  | 400 | 0   | 0.013 | 0.57 |
| 163 | 62     | 63     | 30    | -      | 0   | 0.2  | 400 | 0   | 0.013 | 0.57 |
| 164 | 63R10  | 63R9   | 12    | 63R10  | 30  | 0.15 | 200 | 135 | 0.015 | 0.19 |
| 165 | 63R9   | 63R8   | 30    | -      | 0   | 0.15 | 200 | 0   | 0.015 | 0.19 |
| 166 | 63R8   | 63R7   | 26    | 63R8   | 30  | 0.15 | 200 | 135 | 0.015 | 0.24 |
| 167 | 63R7R2 | 63R7R1 | 30    | 63R7R2 | 30  | 0.15 | 200 | 135 | 0.015 | 0.19 |
| 168 | 63R7R1 | 63R7   | 20.01 | 63R7R1 | 30  | 0.15 | 200 | 135 | 0.015 | 0.24 |
| 169 | 63R7   | 63R6   | 30    | -      | 0   | 0.15 | 200 | 0   | 0.015 | 0.29 |

|     |        |       |       |        |     |      |     |     |       |      |
|-----|--------|-------|-------|--------|-----|------|-----|-----|-------|------|
| 170 | 63R6   | 63R5  | 12    | -      | 0   | 0.15 | 200 | 0   | 0.015 | 0.29 |
| 171 | 63R5R1 | 63R5  | 30    | 63R5R1 | 5   | 0.15 | 200 | 135 | 0.015 | 0.11 |
| 172 | 63R5   | 63R4  | 23    | -      | 0   | 0.15 | 200 | 0   | 0.015 | 0.29 |
| 173 | 63R4   | 63R3  | 30    | -      | 0   | 0.15 | 200 | 0   | 0.015 | 0.29 |
| 174 | 63R3   | 63R2  | 15    | -      | 0   | 0.15 | 200 | 0   | 0.015 | 0.29 |
| 175 | 63R2   | 63R1  | 16    | 63R2   | 10  | 0.15 | 200 | 135 | 0.015 | 0.30 |
| 176 | 63R1   | 63    | 24    | 63R1   | 40  | 0.15 | 200 | 135 | 0.015 | 0.32 |
| 177 | 63     | 64    | 30    | -      | 0   | 0.25 | 400 | 0   | 0.013 | 0.58 |
| 178 | 64     | 65    | 18    | -      | 0   | 0.25 | 400 | 0   | 0.013 | 0.58 |
| 179 | 65R2   | 65R1  | 12    | 65R2   | 10  | 0.15 | 200 | 135 | 0.015 | 0.14 |
| 180 | 65R1   | 65    | 20    | -      | 0   | 0.15 | 200 | 0   | 0.015 | 0.14 |
| 181 | 65     | 66    | 14.47 | -      | 0   | 0.4  | 670 | 0   | 0.013 | 0.64 |
| 182 | 66     | 67    | 14.47 | -      | 0   | 0.4  | 670 | 0   | 0.013 | 0.64 |
| 183 | 67     | 68    | 30    | -      | 0   | 0.4  | 670 | 0   | 0.013 | 0.64 |
| 184 | 68     | 69    | 30    | -      | 0   | 0.4  | 670 | 0   | 0.013 | 0.64 |
| 185 | 69     | 70    | 30    | -      | 0   | 0.4  | 670 | 0   | 0.013 | 0.64 |
| 186 | 70     | 71    | 30    | -      | 0   | 0.4  | 670 | 0   | 0.013 | 0.64 |
| 187 | 71     | 72    | 30    | -      | 0   | 0.4  | 670 | 0   | 0.013 | 0.64 |
| 188 | 72     | 73    | 30    | -      | 0   | 0.4  | 670 | 0   | 0.013 | 0.64 |
| 189 | 73     | 74    | 30    | -      | 0   | 0.4  | 670 | 0   | 0.013 | 0.64 |
| 190 | 74     | 75    | 30    | -      | 0   | 0.4  | 670 | 0   | 0.013 | 0.64 |
| 191 | 75     | 76    | 30    | -      | 0   | 0.4  | 670 | 0   | 0.013 | 0.64 |
| 192 | 76     | 77    | 30    | -      | 0   | 0.4  | 670 | 0   | 0.013 | 0.64 |
| 193 | 77     | 78    | 30    | -      | 0   | 0.4  | 670 | 0   | 0.013 | 0.64 |
| 194 | 78     | 79    | 30    | -      | 0   | 0.4  | 670 | 0   | 0.013 | 0.64 |
| 195 | 79     | 80    | 30    | -      | 0   | 0.4  | 670 | 0   | 0.013 | 0.64 |
| 196 | 80     | 81    | 30    | -      | 0   | 0.4  | 670 | 0   | 0.013 | 0.64 |
| 197 | 81     | 82    | 30    | -      | 0   | 0.4  | 670 | 0   | 0.013 | 0.64 |
| 198 | 82     | 83    | 30    | -      | 0   | 0.4  | 670 | 0   | 0.013 | 0.64 |
| 199 | 83     | 84    | 30    | -      | 0   | 0.4  | 670 | 0   | 0.013 | 0.64 |
| 200 | 84     | 85    | 30    | -      | 0   | 0.4  | 670 | 0   | 0.013 | 0.64 |
| 201 | 85     | 86    | 30    | -      | 0   | 0.4  | 670 | 0   | 0.013 | 0.64 |
| 202 | 86     | 87    | 30    | -      | 0   | 0.4  | 670 | 0   | 0.013 | 0.64 |
| 203 | 87     | 88    | 11    | -      | 0   | 0.4  | 670 | 0   | 0.013 | 0.64 |
| 204 | 88     | 89    | 15.56 | -      | 0   | 0.4  | 670 | 0   | 0.013 | 0.64 |
| 205 | 89     | 90    | 15    | -      | 0   | 0.4  | 670 | 0   | 0.013 | 0.64 |
| 206 | 90     | CM    | 5     | -      | 0   | 0.4  | 670 | 0   | 0.013 | 0.64 |
| 207 | 91     | 92    | 25    | 91     | 30  | 0.15 | 200 | 135 | 0.015 | 0.19 |
| 208 | 92     | 93    | 18    | -      | 0   | 0.15 | 200 | 0   | 0.015 | 0.19 |
| 209 | 93R3   | 93R2  | 25    | 93R3   | 210 | 0.15 | 200 | 135 | 0.015 | 0.34 |
| 210 | 93R2   | 93R1  | 25    | -      | 0   | 0.15 | 200 | 0   | 0.015 | 0.34 |
| 211 | 93R1   | 93    | 23.5  | -      | 0   | 0.15 | 200 | 0   | 0.015 | 0.34 |
| 212 | 93     | 94    | 30    | 93     | 60  | 0.15 | 200 | 135 | 0.015 | 0.38 |
| 213 | 94     | 95    | 22    | -      | 0   | 0.15 | 200 | 0   | 0.015 | 0.38 |
| 214 | 95     | 96    | 23    | 95     | 240 | 0.15 | 200 | 135 | 0.015 | 0.45 |
| 215 | 96     | 97    | 23    | 96     | 60  | 0.15 | 200 | 135 | 0.015 | 0.46 |
| 216 | 97     | 98    | 28    | 97     | 60  | 0.15 | 200 | 135 | 0.015 | 0.47 |
| 217 | 98     | 99    | 15.5  | 98     | 60  | 0.15 | 200 | 135 | 0.015 | 0.48 |
| 218 | 99     | 100   | 30    | -      | 0   | 0.15 | 200 | 0   | 0.015 | 0.48 |
| 219 | 100    | 101   | 25    | -      | 0   | 0.15 | 200 | 0   | 0.015 | 0.48 |
| 220 | 101L1  | 101   | 30    | 101L1  | 60  | 0.15 | 200 | 135 | 0.015 | 0.24 |
| 221 | 101    | 102   | 25    | -      | 0   | 0.15 | 200 | 0   | 0.015 | 0.49 |
| 222 | 102L2  | 102L1 | 27    | 102L2  | 90  | 0.15 | 200 | 135 | 0.015 | 0.27 |
| 223 | 102L1  | 102   | 30    | 102L1  | 30  | 0.15 | 200 | 135 | 0.015 | 0.29 |
| 224 | 102    | 103   | 30    | -      | 0   | 0.15 | 200 | 0   | 0.015 | 0.51 |
| 225 | 103    | 104   | 30    | -      | 0   | 0.15 | 200 | 0   | 0.015 | 0.51 |
| 226 | 104    | 105   | 25    | -      | 0   | 0.15 | 200 | 0   | 0.015 | 0.51 |
| 227 | 105    | 106   | 22    | -      | 0   | 0.15 | 200 | 0   | 0.015 | 0.51 |

|     |       |       |       |       |     |      |     |     |       |      |
|-----|-------|-------|-------|-------|-----|------|-----|-----|-------|------|
| 228 | 106   | 107   | 30    | -     | 0   | 0.15 | 200 | 0   | 0.015 | 0.51 |
| 229 | 107   | 108   | 30    | -     | 0   | 0.15 | 200 | 0   | 0.015 | 0.51 |
| 230 | 108L2 | 108L1 | 14    | 108L2 | 100 | 0.15 | 200 | 135 | 0.015 | 0.27 |
| 231 | 108L1 | 108   | 30    | -     | 0   | 0.15 | 200 | 0   | 0.015 | 0.27 |
| 232 | 108   | 109   | 30    | -     | 0   | 0.15 | 220 | 0   | 0.015 | 0.51 |
| 233 | 109   | 110   | 13    | -     | 0   | 0.15 | 220 | 0   | 0.015 | 0.51 |
| 234 | 110   | 111   | 15    | -     | 0   | 0.15 | 220 | 0   | 0.015 | 0.51 |
| 235 | 111R4 | 111R3 | 30    | 111R4 | 140 | 0.15 | 200 | 135 | 0.015 | 0.30 |
| 236 | 111R3 | 111R2 | 27.27 | -     | 0   | 0.15 | 200 | 0   | 0.015 | 0.30 |
| 237 | 111R2 | 111R1 | 30    | 111R2 | 190 | 0.15 | 200 | 135 | 0.015 | 0.39 |
| 238 | 111R1 | 111   | 15    | -     | 0   | 0.15 | 200 | 0   | 0.015 | 0.39 |
| 239 | 111   | 112   | 23    | -     | 0   | 0.15 | 260 | 0   | 0.015 | 0.51 |
| 240 | 112   | 113   | 17    | -     | 0   | 0.15 | 260 | 0   | 0.015 | 0.51 |
| 241 | 113   | 114   | 15    | 113   | 100 | 0.15 | 260 | 135 | 0.015 | 0.52 |
| 242 | 114   | 115   | 30    | -     | 0   | 0.15 | 260 | 0   | 0.015 | 0.52 |
| 243 | 115   | 116   | 25    | -     | 0   | 0.15 | 260 | 0   | 0.015 | 0.52 |
| 244 | 116   | 117   | 23    | -     | 0   | 0.15 | 260 | 0   | 0.015 | 0.52 |
| 245 | 117   | 118   | 24    | -     | 0   | 0.15 | 260 | 0   | 0.015 | 0.52 |
| 246 | 118R2 | 118R1 | 20    | 118R2 | 150 | 0.15 | 200 | 135 | 0.015 | 0.31 |
| 247 | 118R1 | 118   | 20    | 118R1 | 300 | 0.15 | 200 | 135 | 0.015 | 0.42 |
| 248 | 118   | 119   | 30    | -     | 0   | 0.2  | 330 | 0   | 0.013 | 0.57 |
| 249 | 119   | 120   | 30    | 119   | 150 | 0.2  | 350 | 135 | 0.013 | 0.57 |
| 250 | 120   | 121   | 24    | -     | 0   | 0.2  | 350 | 0   | 0.013 | 0.57 |
| 251 | 121   | 122   | 10    | -     | 0   | 0.2  | 350 | 0   | 0.013 | 0.57 |
| 252 | 122   | 123   | 30    | -     | 0   | 0.2  | 350 | 0   | 0.013 | 0.57 |
| 253 | 123   | 124   | 30    | -     | 0   | 0.2  | 350 | 0   | 0.013 | 0.57 |
| 254 | 124   | 125   | 30    | -     | 0   | 0.2  | 350 | 0   | 0.013 | 0.57 |
| 255 | 125   | 126   | 30    | -     | 0   | 0.2  | 350 | 0   | 0.013 | 0.57 |
| 256 | 126   | 127   | 30    | 126   | 540 | 0.2  | 410 | 135 | 0.013 | 0.56 |
| 257 | 127   | 128   | 30    | 127   | 210 | 0.25 | 310 | 135 | 0.013 | 0.64 |
| 258 | 128   | 129   | 30    | 128   | 60  | 0.25 | 310 | 135 | 0.013 | 0.64 |
| 259 | 129R2 | 129R1 | 30.4  | 129R2 | 30  | 0.15 | 200 | 135 | 0.015 | 0.19 |
| 260 | 129R1 | 129   | 30    | 129R1 | 30  | 0.15 | 200 | 135 | 0.015 | 0.24 |
| 261 | 129   | 130   | 30    | -     | 0   | 0.25 | 320 | 0   | 0.013 | 0.64 |
| 262 | 130R2 | 130R1 | 30    | 130R2 | 60  | 0.15 | 200 | 135 | 0.015 | 0.24 |
| 263 | 130R1 | 130   | 15    | -     | 0   | 0.15 | 200 | 0   | 0.015 | 0.24 |
| 264 | 130   | 131   | 30    | -     | 0   | 0.25 | 320 | 0   | 0.013 | 0.64 |
| 265 | 131L4 | 131L3 | 25    | 131L4 | 20  | 0.15 | 200 | 135 | 0.015 | 0.17 |
| 266 | 131L3 | 131L2 | 30    | 131L3 | 30  | 0.15 | 200 | 135 | 0.015 | 0.22 |
| 267 | 131L2 | 131L1 | 20    | 131L2 | 20  | 0.15 | 200 | 135 | 0.015 | 0.25 |
| 268 | 131L1 | 131   | 20    | -     | 0   | 0.15 | 200 | 0   | 0.015 | 0.25 |
| 269 | 131   | 132   | 30    | -     | 0   | 0.25 | 330 | 0   | 0.013 | 0.64 |
| 270 | 132   | 133   | 30    | -     | 0   | 0.25 | 330 | 0   | 0.013 | 0.64 |
| 271 | 133R1 | 133   | 25    | 133R1 | 120 | 0.15 | 200 | 135 | 0.015 | 0.29 |
| 272 | 133   | 134   | 30    | -     | 0   | 0.25 | 330 | 0   | 0.013 | 0.65 |
| 273 | 134   | 135   | 30    | -     | 0   | 0.25 | 330 | 0   | 0.013 | 0.65 |
| 274 | 135   | 136   | 30    | 135   | 120 | 0.25 | 340 | 135 | 0.013 | 0.65 |
| 275 | 136   | 137   | 15    | -     | 0   | 0.25 | 340 | 0   | 0.013 | 0.65 |
| 276 | 137   | 138   | 30    | 137   | 30  | 0.25 | 340 | 135 | 0.013 | 0.65 |
| 277 | 138   | 139   | 30    | 138   | 120 | 0.25 | 350 | 135 | 0.013 | 0.65 |
| 278 | 139   | 140   | 25    | 139   | 90  | 0.25 | 360 | 135 | 0.013 | 0.64 |
| 279 | 140   | 141   | 19.63 | 140   | 60  | 0.25 | 360 | 135 | 0.013 | 0.65 |
| 280 | 141   | 142   | 30    | -     | 0   | 0.25 | 360 | 0   | 0.013 | 0.65 |
| 281 | 142   | 143   | 25    | -     | 0   | 0.25 | 360 | 0   | 0.013 | 0.65 |
| 282 | 143   | 144   | 14    | -     | 0   | 0.25 | 360 | 0   | 0.013 | 0.65 |
| 283 | 144   | 145   | 30    | -     | 0   | 0.25 | 360 | 0   | 0.013 | 0.65 |
| 284 | 145   | 146   | 30    | -     | 0   | 0.25 | 360 | 0   | 0.013 | 0.65 |
| 285 | 146R7 | 146R6 | 30    | 146R7 | 30  | 0.15 | 200 | 135 | 0.015 | 0.19 |

|     |         |         |       |         |     |      |     |     |       |      |
|-----|---------|---------|-------|---------|-----|------|-----|-----|-------|------|
| 286 | 146R6   | 146R5   | 15    | 146R6   | 30  | 0.15 | 200 | 135 | 0.015 | 0.24 |
| 287 | 146R5   | 146R4   | 30    | -       | 0   | 0.15 | 200 | 0   | 0.015 | 0.24 |
| 288 | 146R4L1 | 146R4   | 20    | 146R4L1 | 60  | 0.15 | 200 | 135 | 0.015 | 0.24 |
| 289 | 146R4   | 146R3   | 30    | 146R4   | 100 | 0.15 | 200 | 135 | 0.015 | 0.35 |
| 290 | 146R3   | 146R2   | 30    | -       | 0   | 0.15 | 200 | 0   | 0.015 | 0.35 |
| 291 | 146R2   | 146R1   | 25    | -       | 0   | 0.15 | 200 | 0   | 0.015 | 0.35 |
| 292 | 146R1   | 146     | 16    | -       | 0   | 0.15 | 200 | 0   | 0.015 | 0.35 |
| 293 | 146     | 147     | 30    | -       | 0   | 0.25 | 380 | 0   | 0.013 | 0.64 |
| 294 | 147     | 148     | 30    | -       | 0   | 0.25 | 380 | 0   | 0.013 | 0.64 |
| 295 | 148     | 149     | 18    | 148     | 352 | 0.25 | 400 | 135 | 0.013 | 0.64 |
| 296 | 149     | 150     | 20    | -       | 0   | 0.25 | 400 | 0   | 0.013 | 0.64 |
| 297 | 150     | 151     | 25    | 150     | 22  | 0.25 | 400 | 135 | 0.013 | 0.64 |
| 298 | 151     | 152     | 12    | -       | 0   | 0.25 | 400 | 0   | 0.013 | 0.64 |
| 299 | 152L1   | 152     | 12.29 | 152L1   | 180 | 0.25 | 400 | 135 | 0.013 | 0.27 |
| 300 | 152     | 153     | 25    | -       | 0   | 0.3  | 420 | 0   | 0.013 | 0.64 |
| 301 | 153     | 154     | 30    | -       | 0   | 0.3  | 420 | 0   | 0.013 | 0.64 |
| 302 | 154     | 155     | 17    | -       | 0   | 0.3  | 420 | 0   | 0.013 | 0.64 |
| 303 | 155L2   | 155L1   | 28    | 155L2   | 90  | 0.15 | 200 | 135 | 0.015 | 0.27 |
| 304 | 155L1   | 155     | 30    | -       | 0   | 0.15 | 200 | 0   | 0.015 | 0.27 |
| 305 | 155     | 156     | 22    | -       | 0   | 0.3  | 420 | 0   | 0.013 | 0.64 |
| 306 | 156     | 157     | 14    | -       | 0   | 0.3  | 420 | 0   | 0.013 | 0.64 |
| 307 | 157R13  | 157R12  | 15    | 157R13  | 100 | 0.15 | 200 | 135 | 0.015 | 0.27 |
| 308 | 157R12  | 157R11  | 30    | -       | 0   | 0.15 | 200 | 0   | 0.015 | 0.27 |
| 309 | 157R11  | 157R10  | 30    | -       | 0   | 0.15 | 200 | 0   | 0.015 | 0.27 |
| 310 | 157R10  | 157R9   | 26    | -       | 0   | 0.15 | 200 | 0   | 0.015 | 0.27 |
| 311 | 157R9R6 | 157R9R5 | 30    | 157R9R6 | 301 | 0.15 | 200 | 135 | 0.015 | 0.38 |
| 312 | 157R9R5 | 157R9R4 | 20.85 | 157R9R5 | 250 | 0.15 | 200 | 135 | 0.015 | 0.45 |
| 313 | 157R9R4 | 157R9R3 | 30.01 | -       | 0   | 0.15 | 200 | 0   | 0.015 | 0.45 |
| 314 | 157R9R3 | 157R9R2 | 30    | -       | 0   | 0.15 | 200 | 0   | 0.015 | 0.45 |
| 315 | 157R9R2 | 157R9R1 | 20    | 157R9R2 | 633 | 0.15 | 240 | 135 | 0.015 | 0.51 |
| 316 | 157R9R1 | 157R9   | 16    | -       | 0   | 0.15 | 240 | 0   | 0.015 | 0.51 |
| 317 | 157R9   | 157R8   | 30    | -       | 0   | 0.15 | 240 | 0   | 0.015 | 0.52 |
| 318 | 157R8   | 157R7   | 20    | -       | 0   | 0.15 | 240 | 0   | 0.015 | 0.52 |
| 319 | 157R7   | 157R6   | 20    | -       | 0   | 0.15 | 240 | 0   | 0.015 | 0.52 |
| 320 | 157R6L1 | 157R6   | 25    | 157R6L1 | 73  | 0.15 | 200 | 135 | 0.015 | 0.25 |
| 321 | 157R6R4 | 157R6R3 | 30    | 157R6R4 | 100 | 0.15 | 200 | 135 | 0.015 | 0.27 |
| 322 | 157R6R3 | 157R6R2 | 15    | -       | 0   | 0.15 | 200 | 0   | 0.015 | 0.27 |
| 323 | 157R6R2 | 157R6R1 | 25    | -       | 0   | 0.15 | 200 | 0   | 0.015 | 0.27 |
| 324 | 157R6R1 | 157R6   | 30    | -       | 0   | 0.15 | 200 | 0   | 0.015 | 0.27 |
| 325 | 157R6   | 157R5   | 20    | -       | 0   | 0.15 | 200 | 0   | 0.015 | 0.57 |
| 326 | 157R5   | 157R4   | 30    | -       | 0   | 0.15 | 200 | 0   | 0.015 | 0.57 |
| 327 | 157R4   | 157R3   | 30    | -       | 0   | 0.15 | 200 | 0   | 0.015 | 0.57 |
| 328 | 157R3   | 157R2   | 18    | 157R3   | 5   | 0.15 | 200 | 135 | 0.015 | 0.58 |
| 329 | 157R2   | 157R1   | 30    | -       | 0   | 0.15 | 200 | 0   | 0.015 | 0.58 |
| 330 | 157R1   | 157     | 25    | -       | 0   | 0.15 | 200 | 0   | 0.015 | 0.58 |
| 331 | 157     | 158     | 12    | -       | 0   | 0.3  | 500 | 0   | 0.013 | 0.65 |
| 332 | 158     | 159     | 30    | -       | 0   | 0.3  | 500 | 0   | 0.013 | 0.65 |
| 333 | 159     | 160     | 30    | -       | 0   | 0.3  | 500 | 0   | 0.013 | 0.65 |
| 334 | 160     | 161     | 30    | -       | 0   | 0.3  | 500 | 0   | 0.013 | 0.65 |
| 335 | 161L2   | 161L1   | 25    | 161L2   | 65  | 0.15 | 200 | 135 | 0.015 | 0.24 |
| 336 | 161L1   | 161     | 15    | -       | 0   | 0.15 | 200 | 0   | 0.015 | 0.24 |
| 337 | 161     | 162     | 5.63  | -       | 0   | 0.3  | 520 | 0   | 0.013 | 0.64 |
| 338 | 162     | 65      | 5.63  | -       | 0   | 0.3  | 520 | 0   | 0.013 | 0.64 |

**Table S3.** Identification of Nodes: IIT Madras Network.

| Location | Node # |
|----------|--------|----------|--------|----------|--------|----------|--------|----------|--------|
| 1        | 1      | 31R1     | 24     | 44L7     | 47     | 93       | 70     | 131L2    | 93     |
| 8R14     | 2      | 32R3     | 25     | 44L6     | 48     | 95       | 71     | 133R1    | 94     |



|        |    |        |    |        |    |       |    |         |     |
|--------|----|--------|----|--------|----|-------|----|---------|-----|
| 8R13R1 | 3  | 33L6   | 26 | 44L3   | 49 | 96    | 72 | 135     | 95  |
| 8R7    | 4  | 33L5   | 27 | 45R5   | 50 | 97    | 73 | 137     | 96  |
| 8R6    | 5  | 33L3   | 28 | 45R2   | 51 | 98    | 74 | 138     | 97  |
| 15     | 6  | 33L2   | 29 | 49R4   | 52 | 101L1 | 75 | 139     | 98  |
| 18     | 7  | 33L1   | 30 | 49R3L1 | 53 | 102L2 | 76 | 140     | 99  |
| 19R1   | 8  | 34L2   | 31 | 49R3   | 54 | 102L1 | 77 | 146R7   | 100 |
| 20L6   | 9  | 35R1   | 32 | 49R2R1 | 55 | 108L2 | 78 | 146R6   | 101 |
| 20L3   | 10 | 36R1   | 33 | 53R6   | 56 | 111R4 | 79 | 146R4L1 | 102 |
| 20     | 11 | 36L4   | 34 | 53R2R1 | 57 | 111R2 | 80 | 146R4   | 103 |
| 22R1   | 12 | 36L3   | 35 | 53R1R1 | 58 | 113   | 81 | 148     | 104 |
| 24     | 13 | 36L2   | 36 | 54L4   | 59 | 118R2 | 82 | 150     | 105 |
| 25L3   | 14 | 36L1   | 37 | 63R10  | 60 | 118R1 | 83 | 152L1   | 106 |
| 25L2   | 15 | 39     | 38 | 63R8   | 61 | 119   | 84 | 155L2   | 107 |
| 27R2   | 16 | 40L6L2 | 39 | 63R7R2 | 62 | 126   | 85 | 157R13  | 108 |
| 29R5   | 17 | 40L6   | 40 | 63R7R1 | 63 | 127   | 86 | 157R9R6 | 109 |
| 29R2   | 18 | 40L4L2 | 41 | 63R5R1 | 64 | 128   | 87 | 157R9R5 | 110 |
| 30L7   | 19 | 40L4   | 42 | 63R2   | 65 | 129R2 | 88 | 157R9R2 | 111 |
| 30L6   | 20 | 40L3L1 | 43 | 63R1   | 66 | 129R1 | 89 | 157R6L1 | 112 |
| 30L5L1 | 21 | 40L3   | 44 | 65R2   | 67 | 130R2 | 90 | 157R6R4 | 113 |
| 30L3   | 22 | 40L1   | 45 | 91     | 68 | 131L4 | 91 | 157R3   | 114 |
| 30L2   | 23 | 42     | 46 | 93R3   | 69 | 131L3 | 92 | 161L2   | 115 |
